# Supplementary material for: Cardiotoxicity surveillance via myocardial work among cancer patients treated with immunotherapy
Source: Research Square preprint supplement (doi:10.21203/rs.3.rs-6406754/v1), 2025-05-07
Supplement: Supplementary file 1 [file 953707e0f26613676a216dea.docx]

Figure S1. Flowchart demonstrating inclusions, exclusions, and final data of the protocol

Figure S2. Survival was similar between the CTRCD and non-CTRCD groups.

Kaplan-Meier survival curves for OS in patients who were previously using beta-blockers (A), metformin (B) or who experienced CTRCD (C) and IRAEs (D). P-value represents cox regression univariable analysis.
