# Supplementary figures and images for: Cardiotoxicity surveillance via myocardial work among cancer patients treated with immunotherapy
Source: Research Square preprint supplement (doi:10.21203/rs.3.rs-6406754/v1), 2025-05-07

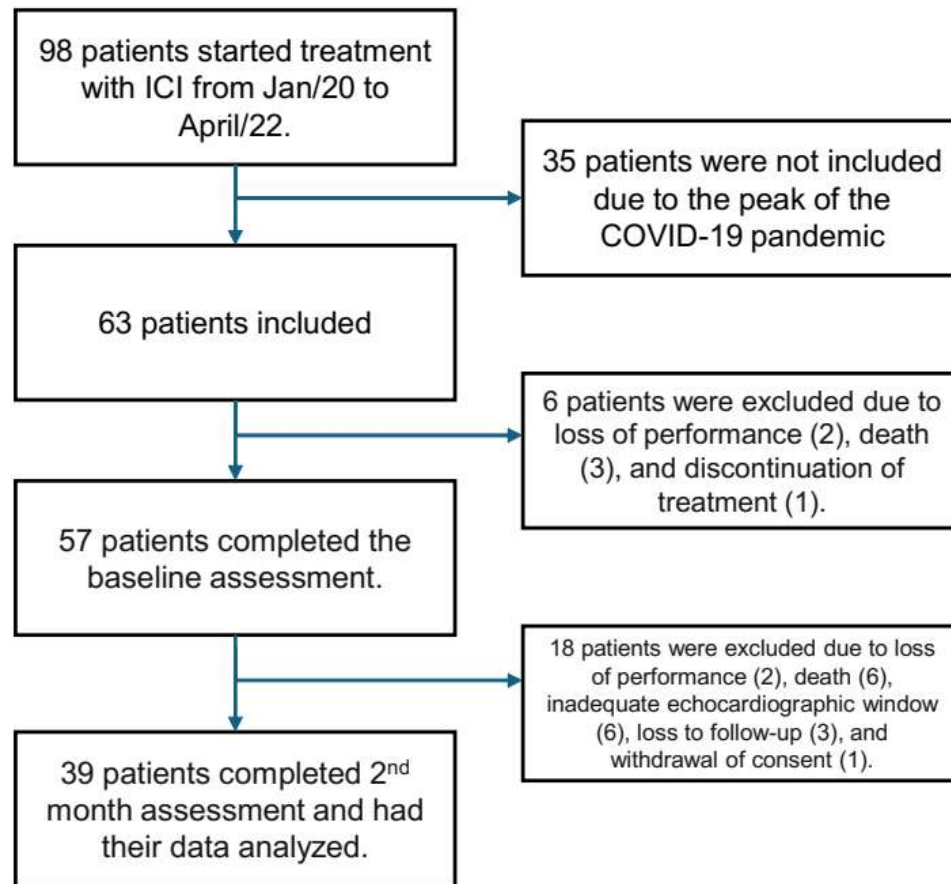

Supplement: Supplementary file 1 [file 5489714f146c880830a51525.pdf]
